# Supplementary material for: Current Status and Barriers of Exercise in Individuals with Spinal Cord Injuries in Korea: A Survey
Source: MDPI journal article supplement (doi:10.3390/healthcare12101030), 2024-05-16
Supplement: s1 [file s1]

| Questions                                |                                      | Response values                                                                                                                   |
|------------------------------------------|--------------------------------------|-----------------------------------------------------------------------------------------------------------------------------------|
| Personal information                     | Gender                               | 1: Male<br>2: Female                                                                                                              |
|                                          | Age (years)                          | 1: 19–28<br>2: 29–38<br>3: 39–48<br>4: 49–58<br>5: 59–68<br>6: Over 69                                                            |
|                                          | Marital status                       | 1: Single<br>2: Married<br>3: Cohabiting<br>4: Divorced or separated<br>5: Widowed                                                |
|                                          | Household composition                | 1: Live alone<br>2: Live with more than two people                                                                                |
|                                          | Income level<br>(Million Korean Won) | 1: Under 2<br>2: 2~3.99<br>3: 4~5.99<br>4: 6~7.99<br>5: 8~9.99<br>6: over 10                                                      |
|                                          |                                      |                                                                                                                                   |
| Injury characteristics and health status | Date of injury                       | 1: Under 3 months<br>2: 3 months ~ 6 months<br>3: 6 months ~ 1 year<br>4: 1 year ~ 5 years<br>5: 5 years ~ 10 years<br>6: Over 10 |
|                                          | Type of injury                       | 1: Trauma<br>2: Disease                                                                                                           |
|                                          | Level of injury                      | 1: Cervical<br>2: Thoracic<br>3: Lumbar<br>4: Sacral                                                                              |
|                                          | ASIA Impairment Scale                | 1: A<br>2: B<br>3: C<br>4: D                                                                                                      |
|                                          | Impact of complication on daily life | 1: No problem at all<br>2: Slightly problematic<br>3: Average<br>4: Severely problematic                                          |
|                                          |                                      |                                                                                                                                   |

|                                        |                                                            |                                                                                    |
|----------------------------------------|------------------------------------------------------------|------------------------------------------------------------------------------------|
|                                        |                                                            | 5: Very severely problematic                                                       |
|                                        |                                                            | 1: No problem at all                                                               |
|                                        |                                                            | 2: Slightly problematic                                                            |
|                                        | Impact of underlying disease on daily life                 | 3: Average                                                                         |
|                                        |                                                            | 4: Severely problematic                                                            |
|                                        |                                                            | 5: Very severely problematic                                                       |
|                                        | Pain score                                                 | 1–10                                                                               |
|                                        |                                                            | 1: Yes                                                                             |
|                                        | Smoking                                                    | 2: No                                                                              |
|                                        |                                                            | 1: Yes                                                                             |
|                                        | Drinking                                                   | 2: No                                                                              |
|                                        | BMI (kg/m <sup>2</sup> )                                   |                                                                                    |
|                                        |                                                            | 1: Very good                                                                       |
|                                        |                                                            | 2: Good                                                                            |
|                                        | Subjective health perception                               | 3: Fair                                                                            |
|                                        |                                                            | 4: Poor                                                                            |
|                                        |                                                            | 5: Very poor                                                                       |
| Physical condition and quality of life | Mobility independence                                      |                                                                                    |
|                                        | Urination                                                  |                                                                                    |
|                                        | Defecation                                                 |                                                                                    |
|                                        | Self-care                                                  |                                                                                    |
| Activity and participation             | Activities of daily living                                 | 1–5                                                                                |
|                                        | Mobility                                                   | 1–5                                                                                |
|                                        | Function and participation                                 | 1–5                                                                                |
|                                        |                                                            | When did you start exercising after injury?                                        |
|                                        |                                                            | What is the intensity of exercise?                                                 |
|                                        | Have you performed self-exercise within the past 3 months? | 1: Yes                                                                             |
|                                        |                                                            | What is the frequency of your exercise?                                            |
|                                        |                                                            | How many minutes do you exercise per workout?                                      |
|                                        |                                                            | Where do you exercise?                                                             |
|                                        |                                                            | 2: No                                                                              |
|                                        |                                                            | What barriers are stopping you from exercising?                                    |
| Status of exercise and requirements    | Have you used a community exercise facility?               | 1: Yes                                                                             |
|                                        |                                                            | How was your satisfaction?                                                         |
|                                        |                                                            | 2: No                                                                              |
|                                        |                                                            | Why haven't you tried it? What are the barriers to you?                            |
|                                        |                                                            | 1: Accurate diagnosis of patient condition and determination of exercise intensity |
|                                        | What support do you want to provide to address barriers?   | 2: Development of exercise plans and provision of programs by stage                |
|                                        |                                                            | 3: Provision of exercise related welfare information and linkage                   |
|                                        |                                                            | 4: Transportation support for visits to exercise facilities                        |
|                                        |                                                            | 5: Rental of exercise equipment                                                    |

---

6: Coordination with professional trainers

7: etc.

---
